# Supplementary material
Source: Springer Nature journal article supplement (https://www.springermedizin.de/resource/supplementary/12955_2013_1344_MOESM1_ESM.pdf/9559594)

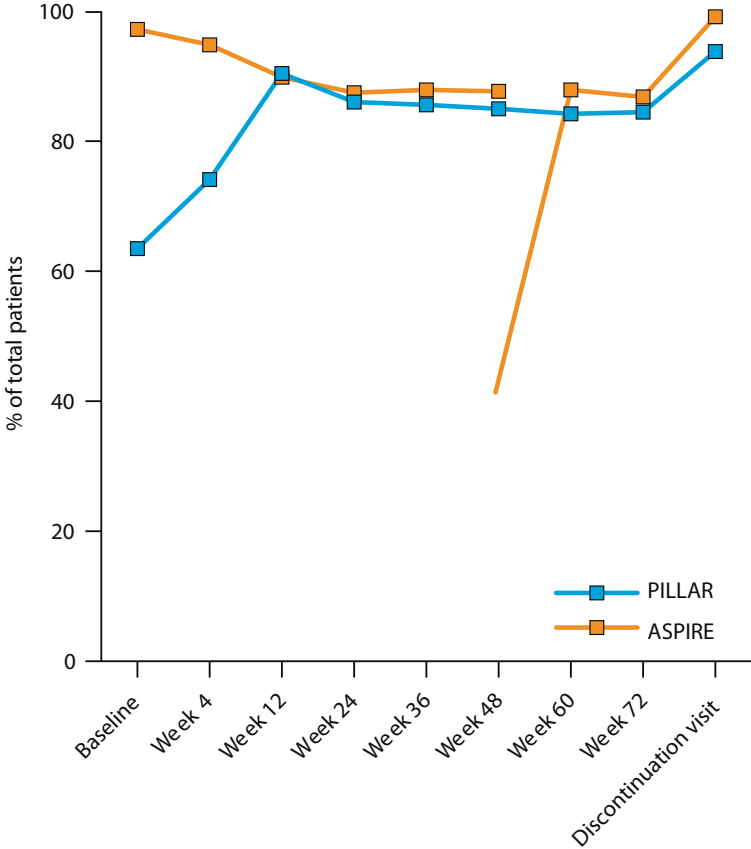

|                       | Any study visit | BL  | Wk 4 | Wk 12 | Wk 24 | Wk 36 | Wk 48 | Wk 60 | Wk 72 | Disc'n visit |
|-----------------------|-----------------|-----|------|-------|-------|-------|-------|-------|-------|--------------|
| PILLAR (ITT, N = 386) | 375             | 245 | 286  | 349   | 332   | 331   | 328   | 325   | 326   | 362          |
| ASPIRE (ITT, N = 462) | 461             | 449 | 438  | 415   | 404   | 406   | 405   | 406   | 401   | 458          |

Supplement: MOESM1 [file 9559594]
